# Supplementary material for: Developing a membrane-proximal CD33-targeting CAR T cell
Source: PubMed Central journal article supplement — J Immunother Cancer. 2024 May 20;12(5):e009013. doi: 10.1136/jitc-2024-009013 (PMC11110598; doi:10.1136/jitc-2024-009013), 2024-05-20
Supplement: jitc-2024-009013supp001.pdf [file jitc-2024-009013supp001.pdf]

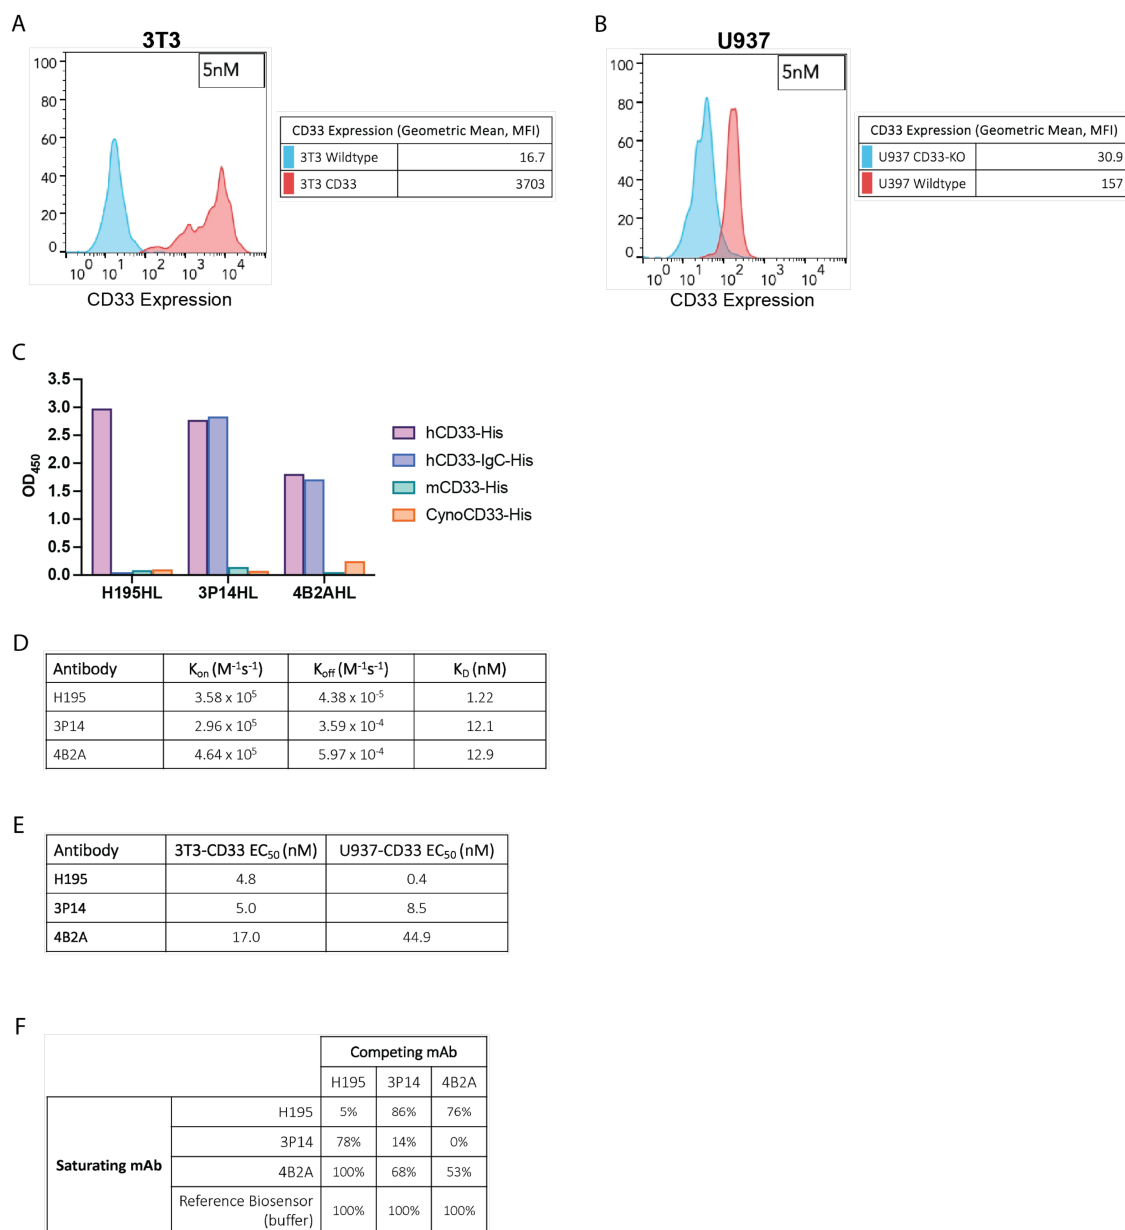

### Supplemental Figure 1. Selection of a membrane-proximal CD33-IgC targeting scFv

(A) Flow cytometry histograms of CD33 expression on 3T3-wildtype and 3T3-CD33 cells detected with fluorescently labeled CD33-specific antibody. (B) Flow cytometry histograms of CD33 expression on U937-wildtype and U937-CD33-knockout cells detected with fluorescently labeled CD33-specific antibody. (C) Quantification of hybridoma-derived monoclonal antibody cross-reactivity as measured by His tag binding. (D) Quantification of hybridoma-derived monoclonal antibody binding kinetics to CD33 in solution. (E) Quantification of  $EC_{50}$  of lead

hybridoma-derived monoclonal antibodies on overexpressing (3T3) and AML cell line (U937).  
**(F)** Quantification of epitope binning of selected hybridoma-derived monoclonal antibodies.

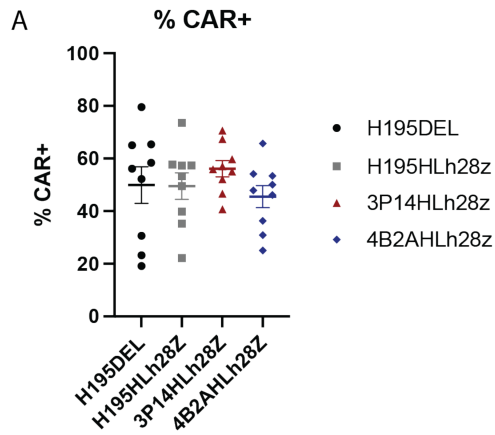

**Supplemental Figure 2. Transduction efficiencies of CAR T cells used for in vitro analysis**  
(A) Dot plot showing CAR expression following human T cell transduction with 4 CAR constructs as detected with fluorescently labeled cetuximab by flow cytometry (n=9 independent biological donors).

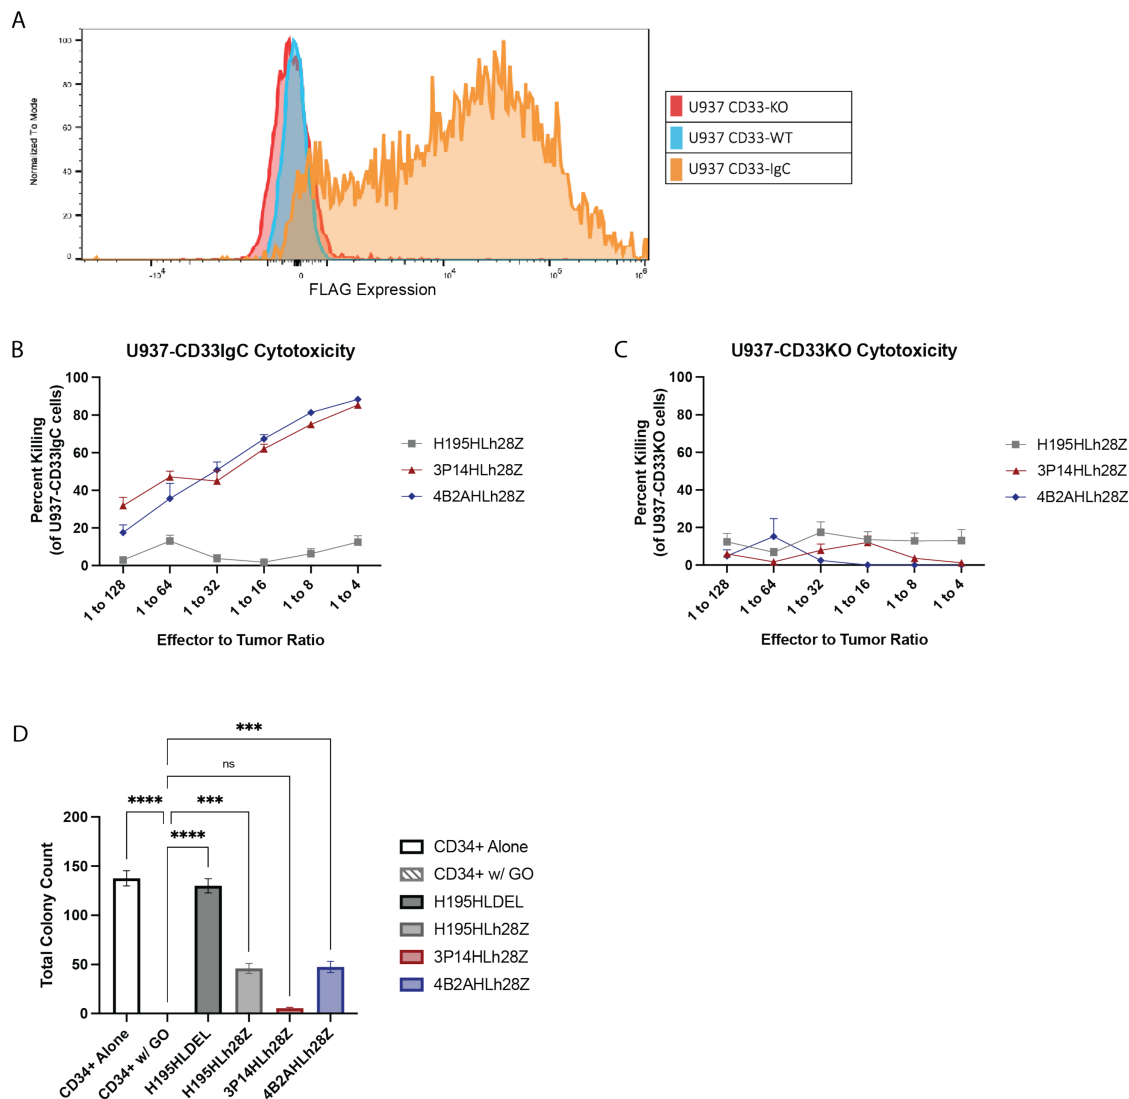

### Supplemental Figure 3. Specificity of membrane-proximal targeting CAR T cells

(A) Flow cytometry histograms depicting FLAG expression on transduced U937-CD33<sup>IgC</sup> tumor cells. (B) 24-hour D-luciferin assay demonstrating lysis of U937-CD33<sup>IgC</sup> tumor cells. Data representative of two independent experiments. (C) 24-hour D-luciferin assay demonstrating lysis of U937-CD33<sup>KO</sup> tumor cells. Data representative of two independent experiments. (D) Quantification of total colonies produced using a colony-forming unit (CFU) assay to measure hematopoietic killing, where total colony count is a composite of BFU-E, GEMM-CFU, and GM-CFU ( $n = 9$ ; \*\*\*\*,  $P < 0.0001$ ; \*\*\*,  $P < 0.001$  by ordinary one-way ANOVA; ns, non-significant). Data are a mean  $\pm$  SEM of three biological replicates conducted in three independent experiments.

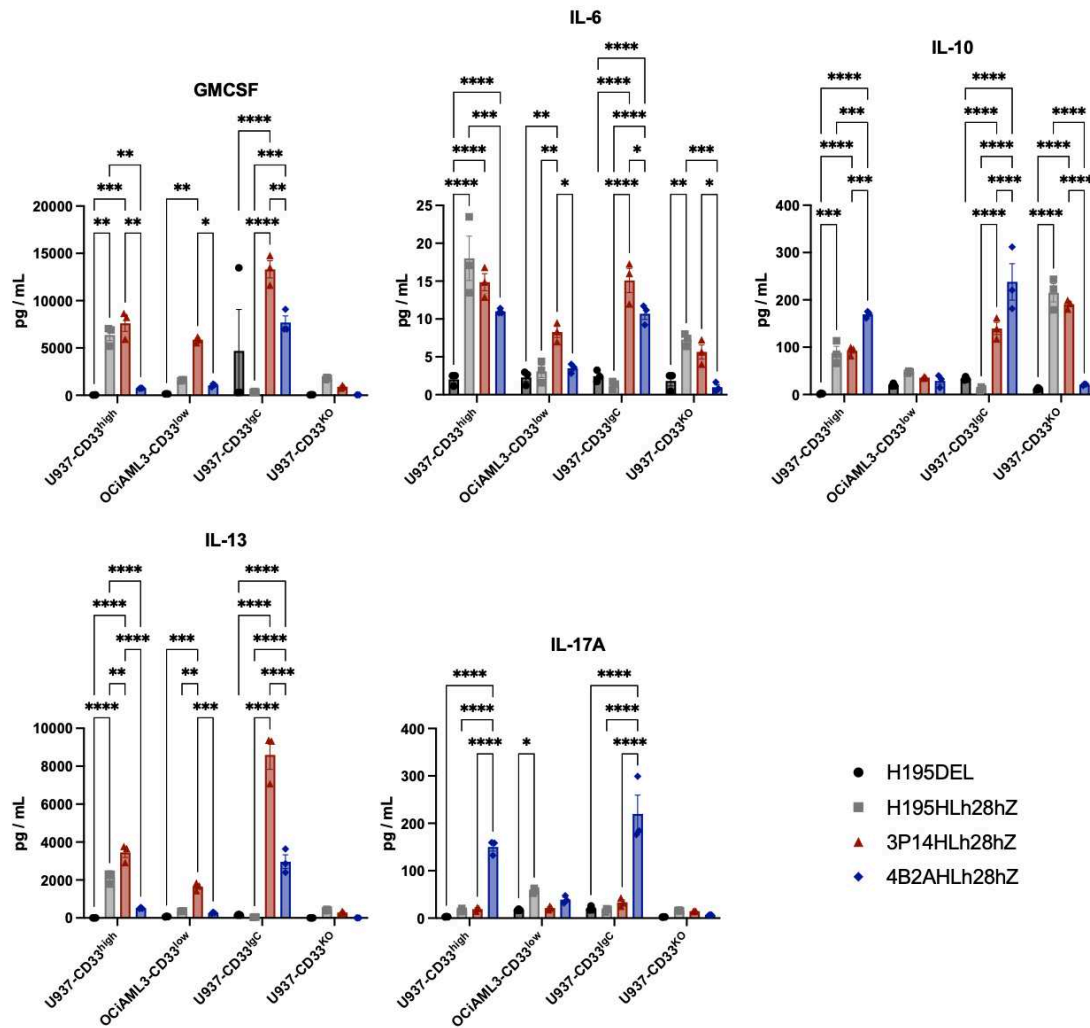

**Supplemental Figure 4.** 24-hour cytokine secretion profile of CAR-T cells when co-cultured with U937-CD33<sup>high</sup>, OCiAML3-CD33<sup>low</sup>, U937-CD33<sup>IgC</sup>, and U937-CD33<sup>KO</sup> tumor as detected by human 12-plex Luminex panel ( $n = 3$ ; \*\*\*\*,  $P < 0.0001$ ; \*\*\*,  $P < 0.001$ ; \*\*,  $P < 0.01$ ; \*,  $P < 0.05$  by two-way ANOVA). Data are a mean  $\pm$  SEM of 3 biological replicates conducted in 3 independent experiments.

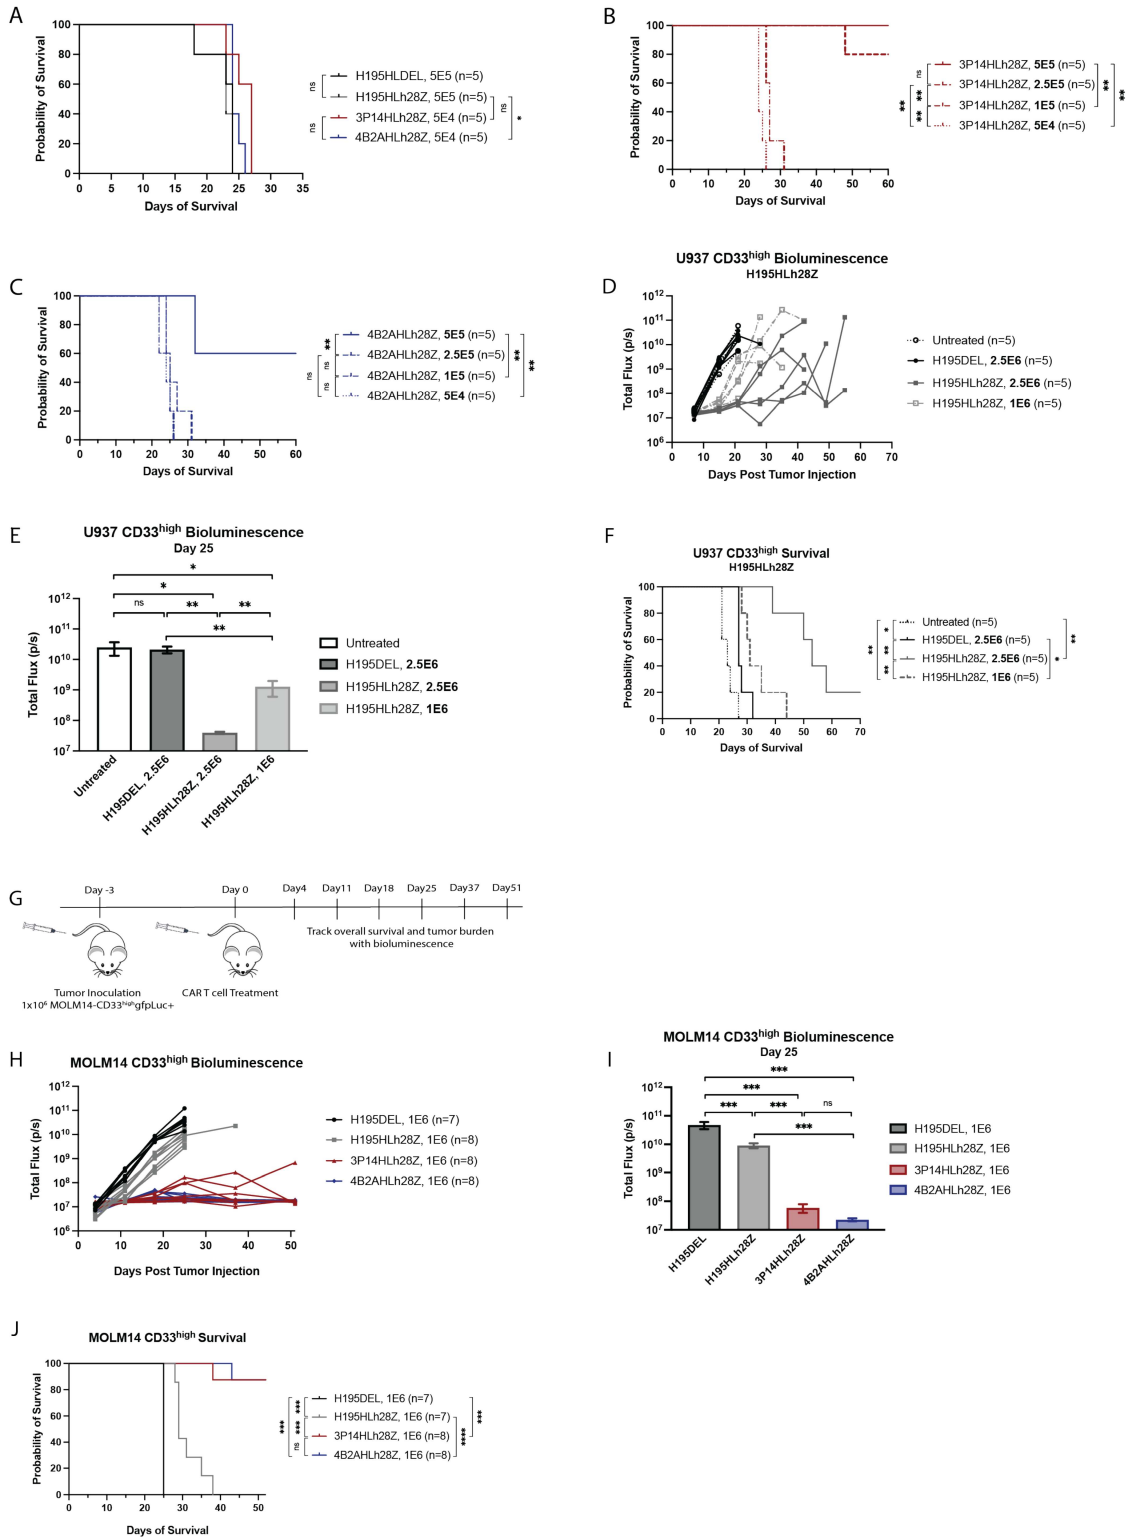

**Supplemental Figure 5. Membrane-proximal CD33-targeting CAR T cells provide enhanced survival in xenograft mouse model** (A) Survival of NCG mice bearing U937-CD33<sup>high</sup> tumors and treated with  $5.0 \times 10^4$  CAR T cells ( $n = 5$ ; \*,  $P < 0.05$ ).  $P$  values for survival determined by log-rank Mantel-Cox test, with 95% confidence interval. (B) Survival of NCG mice bearing U937-CD33<sup>high</sup> tumors and treated with titrated doses of 3P14HLh28hZ CAR T cells ( $n = 5$ ; \*\*,  $P < 0.01$ ).  $P$  values for survival determined by log-rank Mantel-Cox test, with 95% confidence interval. (C) Survival of NCG mice bearing U937-CD33<sup>high</sup> tumors and treated with titrated doses of 4B2AHLh28hZ CAR T cells ( $n = 5$ ; \*\*,  $P < 0.01$ ).  $P$  values for survival determined by log-rank Mantel-Cox test, with 95% confidence interval. (D) Bioluminescence over time of U937-CD33<sup>high</sup> in tumor-bearing NCG mice treated with higher doses of CAR T cells. (E) Day 25 bioluminescent total body flux of U937-CD33<sup>high</sup> tumor-bearing NCG mice treated with higher doses of CAR T cells. (F) Survival of NCG mice bearing U937-CD33<sup>high</sup> tumors and treated with higher doses of CAR T cells ( $n = 5$ , \*\*,  $P < 0.01$ ; \*,  $P < 0.05$ ).  $P$  values for survival determined by log-rank Mantel-Cox test, with 95% confidence interval. (G) Schematic diagram of *in vivo* experimental setup. NCG mice were inoculated with MOLM14-CD33<sup>high</sup> tumor and subsequently treated with CAR T cells. (H) Bioluminescence over time of MOLM14-CD33<sup>high</sup> in tumor-bearing NCG mice treated with  $1.0 \times 10^6$  CAR T cells. (I) Day 25 bioluminescent total body flux of MOLM14-CD33<sup>high</sup> tumor-bearing NCG mice treated with  $1.0 \times 10^6$  CAR T cells. (J) Survival of NCG mice bearing MOLM14-CD33<sup>high</sup> tumors and treated with  $1.0 \times 10^6$  CAR T cells ( $n = 7$  or  $8$ , \*\*\*\*,  $P < 0.0001$ ; \*\*\*,  $P < 0.001$ ; ns, non-significant).  $P$  values for survival determined by log-rank Mantel-Cox test, with 95% confidence interval.

**Supplemental Table 1.** Flow cytometry antibodies.

| Specificity            | Clone       | Fluorophore                             |
|------------------------|-------------|-----------------------------------------|
| <b>CD69</b>            | FN50        | BV750                                   |
| <b>CD183</b>           | G025H7      | BV650                                   |
| <b>CD152</b>           | L3D10       | PE-Cy7                                  |
| <b>CD244</b>           | C1.7        | APC                                     |
| <b>CD357</b>           | 108-17      | APC-Fire 750                            |
| <b>CD197</b>           | 2-L1-A      | BUV395                                  |
| <b>CD45RO</b>          | UCHL1       | SB702                                   |
| <b>CD3</b>             | UCHT1       | BUV496                                  |
| <b>TCR alpha/beta</b>  | IP26        | Brilliant Violet 510                    |
| <b>TCR gamma/delta</b> | B1          | Alexa Fluor 532                         |
| <b>CD223</b>           | 11C3C65     | PerCP-Cy5.5                             |
| <b>CD194</b>           | MM0064-9G12 | DyLight 550                             |
| <b>CD45RA</b>          | HI100       | Alexa Fluor 594                         |
| <b>EGFR</b>            |             | PE                                      |
| <b>CD186</b>           | 13B 1E5     | FITC                                    |
| <b>CD272</b>           | J168-540    | PE-CF594                                |
| <b>CD134</b>           | L106        | BV711                                   |
| <b>CD278</b>           | DX29        | BV421                                   |
| <b>CD4</b>             | RPA-T4      | APC-Cy7                                 |
| <b>CD279</b>           | EH12.2H7    | BV785                                   |
| <b>TIGIT</b>           | MBSA43      | PerCP-eF710                             |
| <b>CD137</b>           | 4B4-1       | BUV661                                  |
| <b>CD127</b>           | A019D5      | PE-Cy5                                  |
| <b>CD28</b>            | L293        | BB700                                   |
| <b>CD45</b>            | HI30        | APC Cy7                                 |
| <b>CD45 (mouse)</b>    | 30-F11      | Alexa Fluor 700                         |
| <b>CD8</b>             | SK1         | Alexa Fluor 700                         |
| <b>CD366</b>           | 7D3         | PE-Cy5.5                                |
| <b>CD103</b>           | BER-ACT8    | BV605                                   |
| <b>CD25</b>            | 2A3         | BUV563                                  |
| <b>CD57</b>            | NK-1        | eF450                                   |
| <b>CD95</b>            | DX29        | BV480                                   |
| <b>CD27</b>            | O323        | Alexa Fluor 647                         |
| <b>HLA-DR</b>          | G46-6       | APC-R700                                |
| <b>CD33</b>            | WM53        | PE-Cy7, BV711                           |
| <b>CD62L</b>           | DREG-56     | PE                                      |
| <b>CD2</b>             | TS1/8       | FITC                                    |
| <b>CD371</b>           | 50C1        | APC                                     |
| <b>CD123</b>           | S18016F     | PE-Cy7                                  |
| <b>TIM3</b>            | F38-2E2     | BV510                                   |
| <b>Myc tag</b>         | 9B11        | PE, Alexa Fluor 647,<br>Alexa Fluor 488 |



**Supplemental Table 2.** CD33 antigen density.

| <b>Cell Line</b> | <b>CD33 Antigen Density</b> |
|------------------|-----------------------------|
| MOLM14           | 10114.3                     |
| U937             | 6598.0                      |
| U937 CD33-KO     | 0                           |
| U937 CD33-IgC    | 94.4                        |
| OCiAML3          | 928.4                       |
| AML60B           | 8590.7                      |

**Supplemental Table 3.** Characterization of patient-derived xenograft

|        | Age | Disease Status      | Molecular Aberrations                         | Cytogenetics |
|--------|-----|---------------------|-----------------------------------------------|--------------|
| AML60B | 40  | Relapsed/Refractory | KMT2A-MLLT3 fusion, PDGFRA loss, GSK3B, GATA2 | MLL (11q23)  |

## Supplemental Methods

### In vitro colony forming unit assay

PBMCs were isolated from healthy umbilical cord blood units (New York Blood Center). Following red blood cell lysis with ACK Lysing Buffer (Lonza), CD34<sup>+</sup> stem cells were isolated and subsequently expanded in Serum-Free Expansion Medium (SFEM) II and 1.0  $\mu$ M UM171 (StemCell Technologies). Expanded CD34<sup>+</sup> progenitors and CAR T cells were co-cultured at 1:1 cell ratio for approximately 48 hours. Treated human CD34<sup>+</sup> progenitors were seeded at a density of 3,333 cells/condition into cytokine-supplemented methylcellulose medium (MethoCult H4435; STEMCELL Technologies) on 6-well plates. Each condition was cultured in triplicate. Colonies were propagated in culture and scored at day 10 and counts were averaged across replicates.

### Epitope binning

For epitope binning, human CD33-His was captured by an anti-penta-His biosensor. A 3x3 matrix with 3P14, 4B2A, and H195 was tested. A buffer-only reference biosensor was used to determine the overall capture level for each antibody. After pre-binding the antibodies at saturation levels, the biosensors were dipped into antibody solutions to assess competition.

### Evaluation of CD33 surface densities

The surface densities of CD33 molecules on the cancer cells were examined by standardized flow cytometry using a commercial quantitative analysis kit, QIFIKIT® (Agilent) following the user manual provided by the manufacturer of the kit. Briefly, we set up and optimized the voltages for forward-scattering (FSC), side-scattering (SSC), and BL1 fluorescence channel (for

fluorescein isothiocyanate, FITC) in Attune NxT Flow Cytometer (Invitrogen) using the set-up beads (QIFIKIT®). Next, following standard staining and washing procedures, we stained the calibration beads (QIFIKIT®), a combination of 5 populations of beads bearing different known numbers of mouse antibodies on their surfaces, with FITC-conjugated goat anti-mouse immunoglobulin F(ab')<sub>2</sub> fragment. Then, using flow cytometry, the mean fluorescence intensities (MFIs) of the calibration beads of known surface densities, represented by antigen binding capacity (ABC) values, were recorded, from which a standard curve between the MFI and ABC values was constructed.
